# Supplementary material for: Widespread Cotranslational Formation of Protein Complexes
Source: PubMed Central journal article supplement (PMC3228823; doi:10.1371/journal.pgen.1002398), 2011-12-01

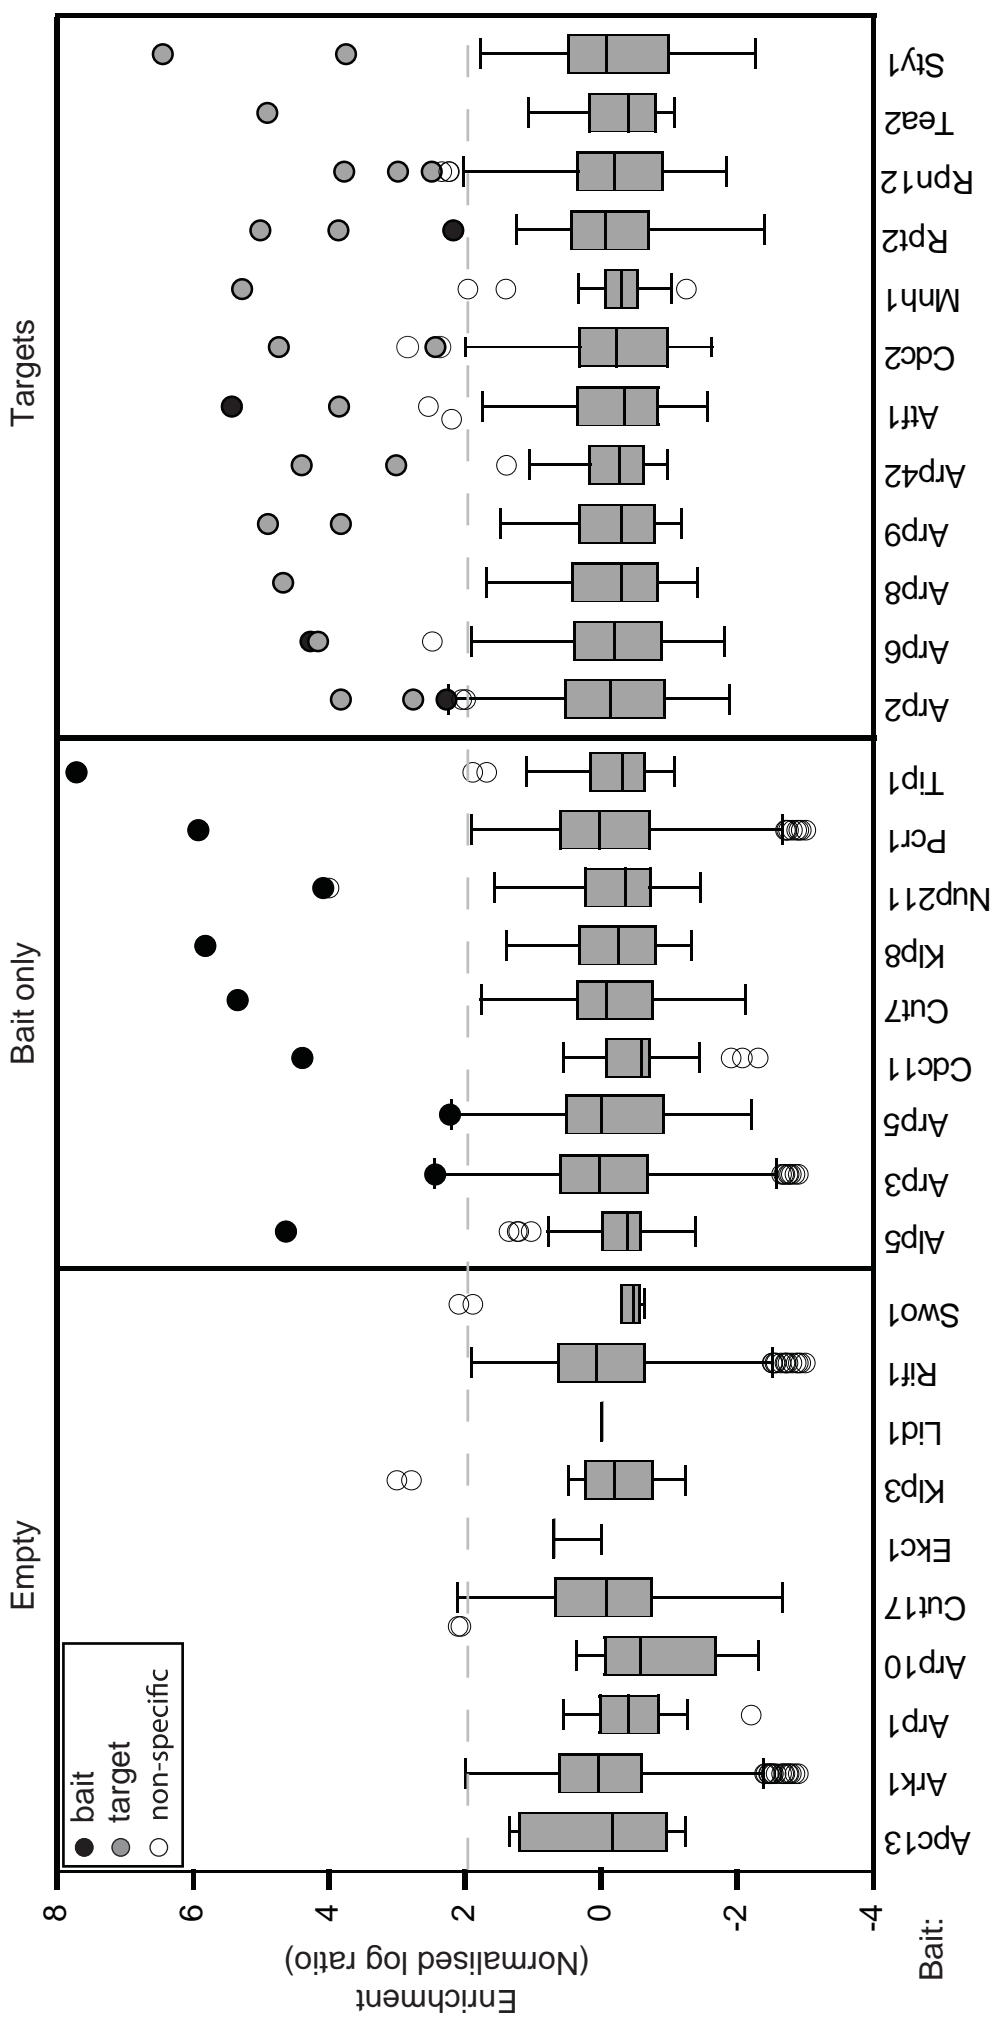

Supplement: pgen.1002398.s003.pdf [file pgen.1002398.s003.pdf]
