# Supplementary material for: Widespread Cotranslational Formation of Protein Complexes
Source: PubMed Central journal article supplement (PMC3228823; doi:10.1371/journal.pgen.1002398), 2011-12-01
Supplement: pgen.1002398.s005.pdf [file pgen.1002398.s005.pdf]

| Bait Protein | Enriched mRNAs (SDs)                                                              | Function of the bait protein                               |
|--------------|-----------------------------------------------------------------------------------|------------------------------------------------------------|
| Apc13-TAP    |                                                                                   | Anaphase-promoting complex subunit                         |
| Ark1-myc     |                                                                                   | Aurora-B kinase                                            |
| Arp10-TAP    |                                                                                   | Dynactin subunit                                           |
| Arp1-TAP     |                                                                                   | Dynactin subunit                                           |
| Arp2-TAP     | <i>arp8</i> (3.8, 4.1, 2.9)<br><i>arp9</i> (2.8, 2.9, 2.4)                        | Member of Arp2/3 complex; involved in actin polymerization |
| Arp3-TAP     | <i>arp3</i> (3.3, 2.5)                                                            | Member of Arp2/3 complex; involved in actin polymerization |
| Arp42-TAP    | <i>snf21</i> (4.4, 4.7)<br><i>snf22</i> (3.0, 3.6)                                | SWI/SNF and RSC complexes; chromatin remodelling           |
| Alp5-TAP     | <i>alp5</i> (4.6, 6.6)                                                            | NuA4, Ino80 and Swr1 complexes; chromatin remodelling      |
| Arp5-TAP     | <i>arp5</i> (5.8, 2.2)                                                            | Ino80 complex; chromatin remodelling                       |
| Arp6-TAP     | <i>alp5</i> (4.2, 4.2, 3.8)<br><i>arp6</i> (4.3, 2.4, 3.8)                        | SWR1 complex; chromatin remodelling                        |
| Arp8-TAP     | <i>ino80</i> (4.7, 2.3)                                                           | Ino80 complex; chromatin remodelling                       |
| Arp9-TAP     | <i>snf21</i> (4.8, 4.9)<br><i>snf22</i> (2.7, 3.8)                                | SWI/SNF and RSC complexes; chromatin remodelling           |
| Atf1-myc     | <i>atf1</i> (5.4, 4.3, 4.5)<br><i>pcr1</i> (3.9, 2.7, 2.0)                        | Transcription factor; stress responses                     |
| Cdc11-TAP    | <i>cdc11</i> (4.4)                                                                | SIN complex scaffold protein                               |
| Cdc2-TAP     | <i>rum1</i> (5.8±2.1, n=7)<br><i>cdc18</i> (3.1±0.5, n=6)                         | Cyclin-dependent protein kinase                            |
| Cut17-myc    |                                                                                   | Survivin protein                                           |
| Cut7-TAP     | <i>cut7</i> (5.3)                                                                 | Spindle pole body motor                                    |
| Ekc1-myc     |                                                                                   | Protein phosphatase regulatory subunit                     |
| Klp3-TAP     |                                                                                   | Kinesin-like protein                                       |
| Klp8-TAP     | <i>klp8</i> (5.8)                                                                 | Kinesin-like protein                                       |
| Lid1-TAP     |                                                                                   | Anaphase-promoting complex subunit                         |
| Rpt2-myc     | <i>ubp6</i> (5.0, 4.9)<br><i>rhp23</i> (3.9, 3.7)                                 | 19S proteasome regulatory subunit                          |
| Rpn12-myc    | <i>ecm29</i> (3.8, 3.6)<br><i>rpn1301</i> (2.2, 2.9)<br><i>rpn1302</i> (3.0, 2.6) | 19S proteasome regulatory subunit                          |
| Nup211-TAP   | <i>nup211</i> (4.1, 11.2)                                                         | Nucleoporin                                                |
| Pcr1-myc     | <i>pcr1</i> (5.9, 4.8, 4.1)                                                       | Transcription factor; stress responses                     |
| Rif1-myc     |                                                                                   | Telomere length regulator                                  |
| Mnh1-TAP     | <i>SPBC19C7.01/mni1</i><br>(4.4, 5.3)                                             | Mago nashi homolog                                         |
| Sty1-myc     | <i>pyp2</i> (5.4±0.8, n=8)<br><i>cip2</i> (4.9±1.4, n=6)                          | MAP kinase; stress responses                               |
| Swo1-TAP     |                                                                                   | Hsp90 chaperone                                            |
| Tea2-TAP     | <i>tip1</i> (5.2±1.5, n=7)                                                        | Kinesin-like protein                                       |
| Tip1-TAP     | <i>tip1</i> (7.7)                                                                 | CLIP-170 family proteins                                   |
