# Supplementary material for: Widespread Cotranslational Formation of Protein Complexes
Source: PubMed Central journal article supplement (PMC3228823; doi:10.1371/journal.pgen.1002398), 2011-12-01
Supplement: pgen.1002398.s006.pdf [file pgen.1002398.s006.pdf]

| <b>Genotype</b>                                                                                | <b>Source</b>                    |
|------------------------------------------------------------------------------------------------|----------------------------------|
| <i>apc13-TAP::kanMX6 ade6-M210 leu1-32 ura4-D18 h-</i>                                         | K. Gould (Vanderbilt University) |
| <i>alp5-2xTAP::kanMX6/+ ade6-M210/ade6-M216 h+/h+</i>                                          | This work                        |
| <i>ark1-8xmyc-6xhis::LEU2 leu1-32 h-</i>                                                       | YGRC                             |
| <i>arp1-2xTAP::kanMX6/+ pat1-114/pat1-114 ade6-M210/ade6-M216 h+/h+</i>                        | This work                        |
| <i>arp2- 2xTAP::kanMX6 h+</i>                                                                  | This work                        |
| <i>arp3-2xTAP::kanMX6 h+</i>                                                                   | This work                        |
| <i>arp42-2xTAP::kanMX6 h+</i>                                                                  | This work                        |
| <i>arp5-2xTAP::kanMX6 h+</i>                                                                   | This work                        |
| <i>arp6-2xTAP::kanMX6/+ ade6-M210/ade6-M216 h+/h+</i>                                          | This work                        |
| <i>arp8-2xTAP::kanMX6 h-</i>                                                                   | This work                        |
| <i>arp9-2xTAP::kanMX6 h-</i>                                                                   | This work                        |
| <i>arp10-2xTAP::kanMX6/+ h+/h-</i>                                                             | This work                        |
| <i>atf1-13xmyc::kanMx6 leu1-32 ura4-D18 his7 ade6-216 h-</i>                                   | N. Jones (Manchester, UK)        |
| <i>cdc11-TAP::kanMX6 ade6-M210 ura4-D18 leu1-32 h-</i>                                         | K. Gould (Vanderbilt University) |
| <i>cdc2-TAP::kanMX6 ade6-M210 ura4-D18 leu1-32 h-</i>                                          | K. Gould (Vanderbilt University) |
| <i>cdc2-TAP::kanMX6 rum1Δ::ura4+ ura4-D18 leu1-32 ade6-M210 h90</i>                            | This work                        |
| <i>cdc2-TAP::kanMX6 rum1Δ::ura4+ pJK148-rum1-ATG+::leu1+ ura4-D18 leu1-32 ade6-M210 h90</i>    | This work                        |
| <i>cdc2-TAP::kanMX6 rum1Δ::ura4+ pJK148-rum1-ATG-5xΔ::leu1+ ura4-D18 leu1-32 ade6-M210 h90</i> | This work                        |
| <i>cip2Δ::natMX6 leu1-32 ura4-D18 ade6-M21? h+</i>                                             | This work                        |
| <i>cut7-2xTAP::kanMX6 h+</i>                                                                   | This work                        |
| <i>cut17-8xmyc::LEU2 leu1-32 h-</i>                                                            | YGRC                             |
| <i>ekc1-myc::ura4+ leu1-32 ura4-D18 h-</i>                                                     | YGRC                             |
| <i>klp3-2xTAP::kanMX6 ade6-M216</i>                                                            | This work                        |
| <i>klp8-2xTAP::kanMX6 ade6-M216</i>                                                            | This work                        |
| <i>lid1-TAP ade6-M210 leu1-32 ura4-D18 h-</i>                                                  | K. Gould (Vanderbilt University) |
| <i>mnh1-2xTAP:kanMX6 (SPBC3B9.08c)</i>                                                         | This work                        |
| <i>rpt2-8xmyc::LEU2 leu1-32 h-</i>                                                             | YGRC                             |
| <i>rpn12-8xmyc::LEU2 leu1-32 h-</i>                                                            | YGRC                             |
| <i>nup211-2xTAP::kanMX6 h90</i>                                                                | This work                        |

|                                                                                                          |                              |
|----------------------------------------------------------------------------------------------------------|------------------------------|
| <i>pcr1-12xmyc::kanMx6 h-</i>                                                                            | N. Jones (Manchester, UK)    |
| <i>rif1-12xmyc::ura4+ ade6-M210 leu1-32 ura4-D18 h90</i>                                                 | YGRC                         |
| <i>rum1::ura4+ ura4-D18 leu1-32 ade6-M210 h90</i>                                                        | S. Moreno (Salamanca, Spain) |
| <i>sty1-12xmyc::kanMX6 cip2Δ::natMX6 leu1-32 ade6-M21? pJK148-cip2-ATG+::leu1+ h+</i>                    | This work                    |
| <i>sty1-12xmyc::kanMX6 cip2Δ::natMX6 leu1-32 ade6-M21? pJK148-cip2-ATG+::leu1+ csx1Δ::hygMX6 leu1-32</i> | This work                    |
| <i>sty1-12xmyc::kanMX6 cip2Δ::natMX6 leu1-32 ade6-M21? pJK148-cip2-ATGΔ::leu1+ csx1Δ::hygMX6 leu1-32</i> | This work                    |
| <i>sty1-12xmyc::kanMX6 cip2Δ::natMX6 leu1-32 ade6-M21? pJK148-cip2-ATGΔ::leu1+ h+</i>                    | This work                    |
| <i>sty1-12xmyc::kanMX6 cip2Δ::natMX6 leu1-32 ade6-M21? h+</i>                                            | This work                    |
| <i>sty1-12xmyc::kanMX6 leu1-32 ade6-M216 h-</i>                                                          | YGRC                         |
| <i>swo1- 2xTAP::kanMX6 h90</i>                                                                           | This work                    |
| <i>tea2-2xTAP::hygMX6 tip1Δ::kanMX4 leu1-32 h-</i>                                                       | This work                    |
| <i>tea2-2xTAP::hygMX6 tip1Δ::kanMX4 leu1-32 pJK148-tip1-ATG+::leu1+ h-</i>                               | This work                    |
| <i>tea2-2xTAP::hygMX6 tip1Δ::kanMX4 leu1-32 pJK148-tip1-ATGΔ::leu1+ h-</i>                               | This work                    |
| <i>tea2-2xTAP::kanMX6 h90</i>                                                                            | This work                    |
| <i>tip1Δ::kanMX4 leu1-32 ade6-M21? ura4-D18 h+</i>                                                       | J. Hayles (London, UK)       |
| <i>tip1-2xTAP::kanMX6 ade6-M216 h-</i>                                                                   | This work                    |
